# Supplementary material for: Genetic Variation, Not Cell Type of Origin, Underlies the Majority of Identifiable Regulatory Differences in iPSCs
Source: PubMed Central journal article supplement (PMC4727884; doi:10.1371/journal.pgen.1005793), 2016-01-26

# qPCR for canonical pluripotency transcription factors

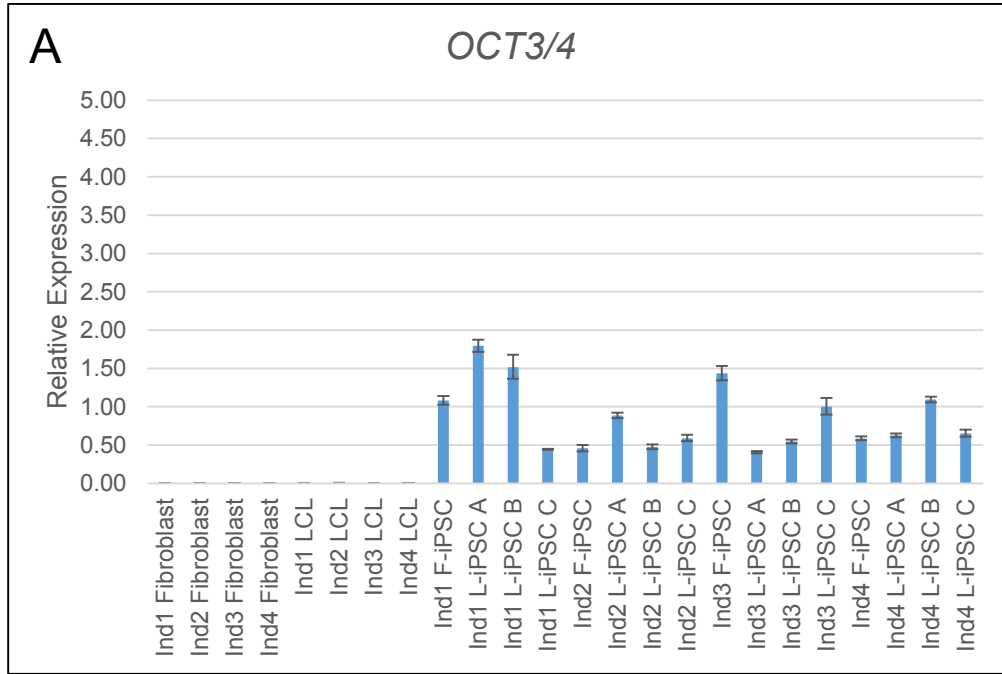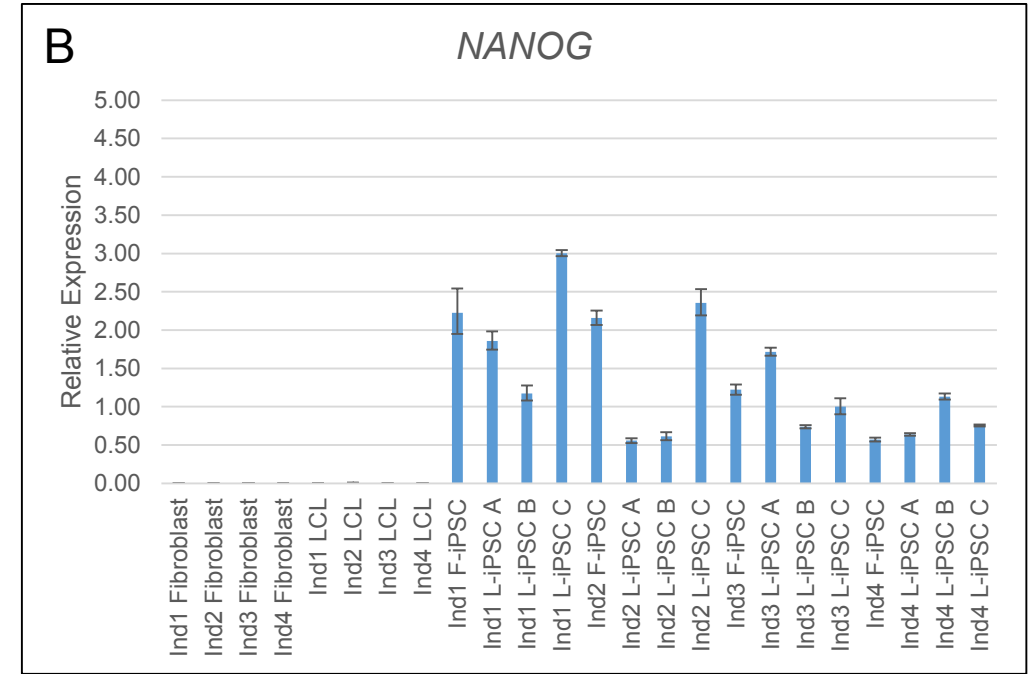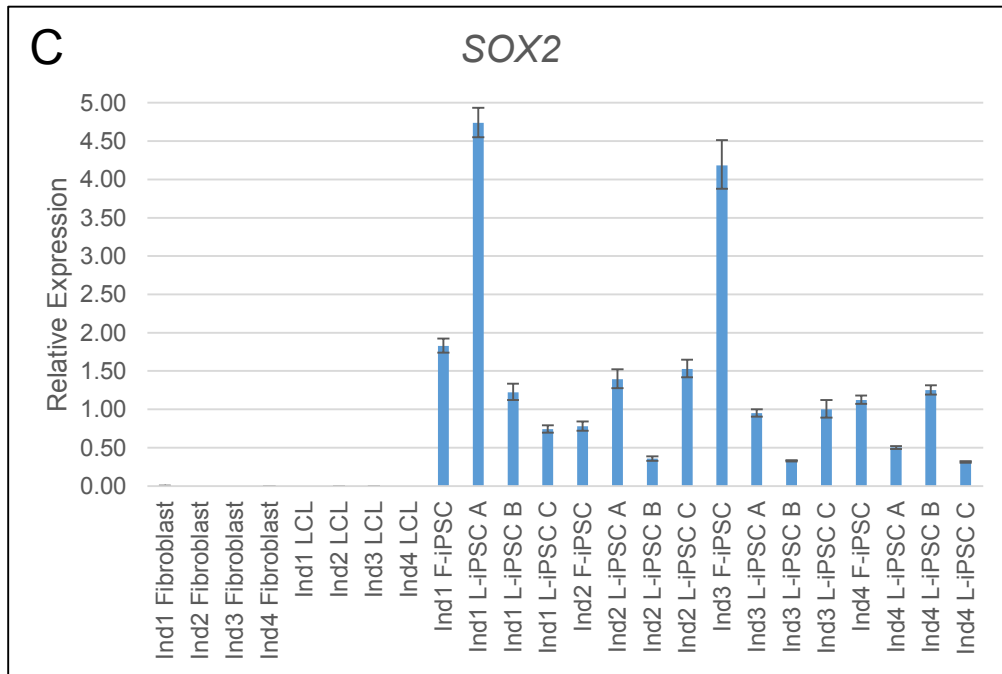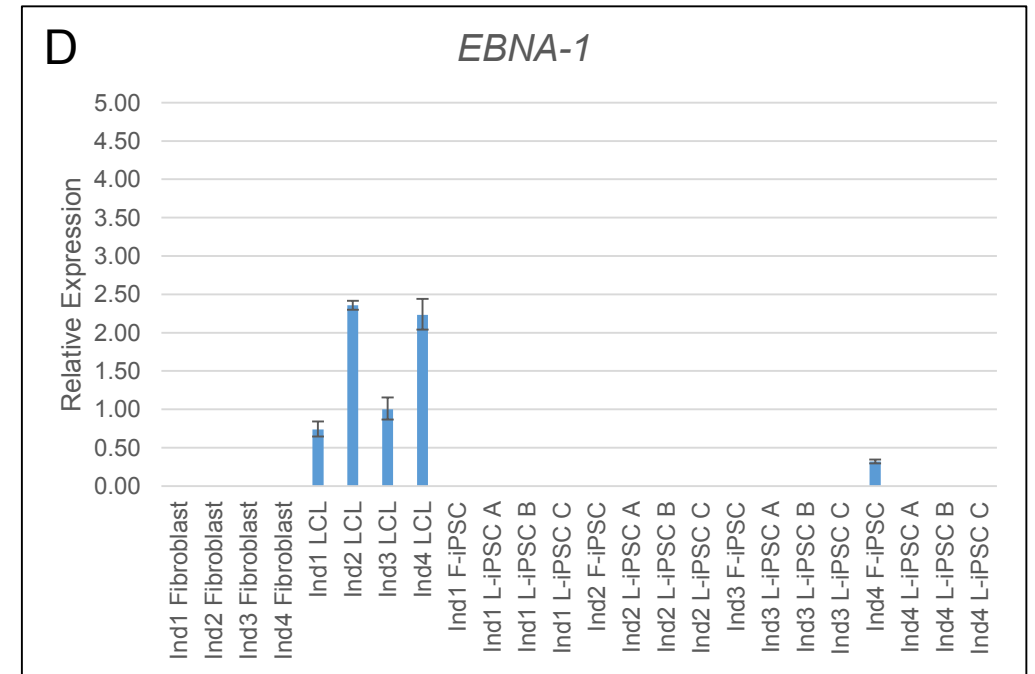

Supplement: pgen.1005793.s002.pdf [file pgen.1005793.s002.pdf]
