# Supplementary material for: Genetic Variation, Not Cell Type of Origin, Underlies the Majority of Identifiable Regulatory Differences in iPSCs
Source: PubMed Central journal article supplement (PMC4727884; doi:10.1371/journal.pgen.1005793), 2016-01-26

A

1kb ladder  
 Ind1-Fibroblast  
 Ind4-Fibroblast  
 Ind2-Fibroblast  
 Ind3-Fibroblast  
 Ind1-LCL  
 Ind4-LCL  
 Ind3-LCL  
 Ind2-LCL  
 Ind1 L-iPSC A  
 Ind2 L-iPSC C  
 Ind4 L-iPSC B  
 Ind3 L-iPSC C  
 Ind2 L-iPSC B  
 Ind3 L-iPSC A  
 Ind4 L-iPSC C  
 Ind2 L-iPSC A  
 Ind1 L-iPSC C  
 Ind4 L-iPSC A  
 Ind1 L-iPSC B  
 Ind3 L-iPSC B  
 Ind1 F-iPSC  
 Ind3 F-iPSC  
 Ind2 F-iPSC  
 Ind4 F-iPSC  
 Negative control  
 Positive control 1  
 Positive control 2  
 Blank  
 1kb ladder

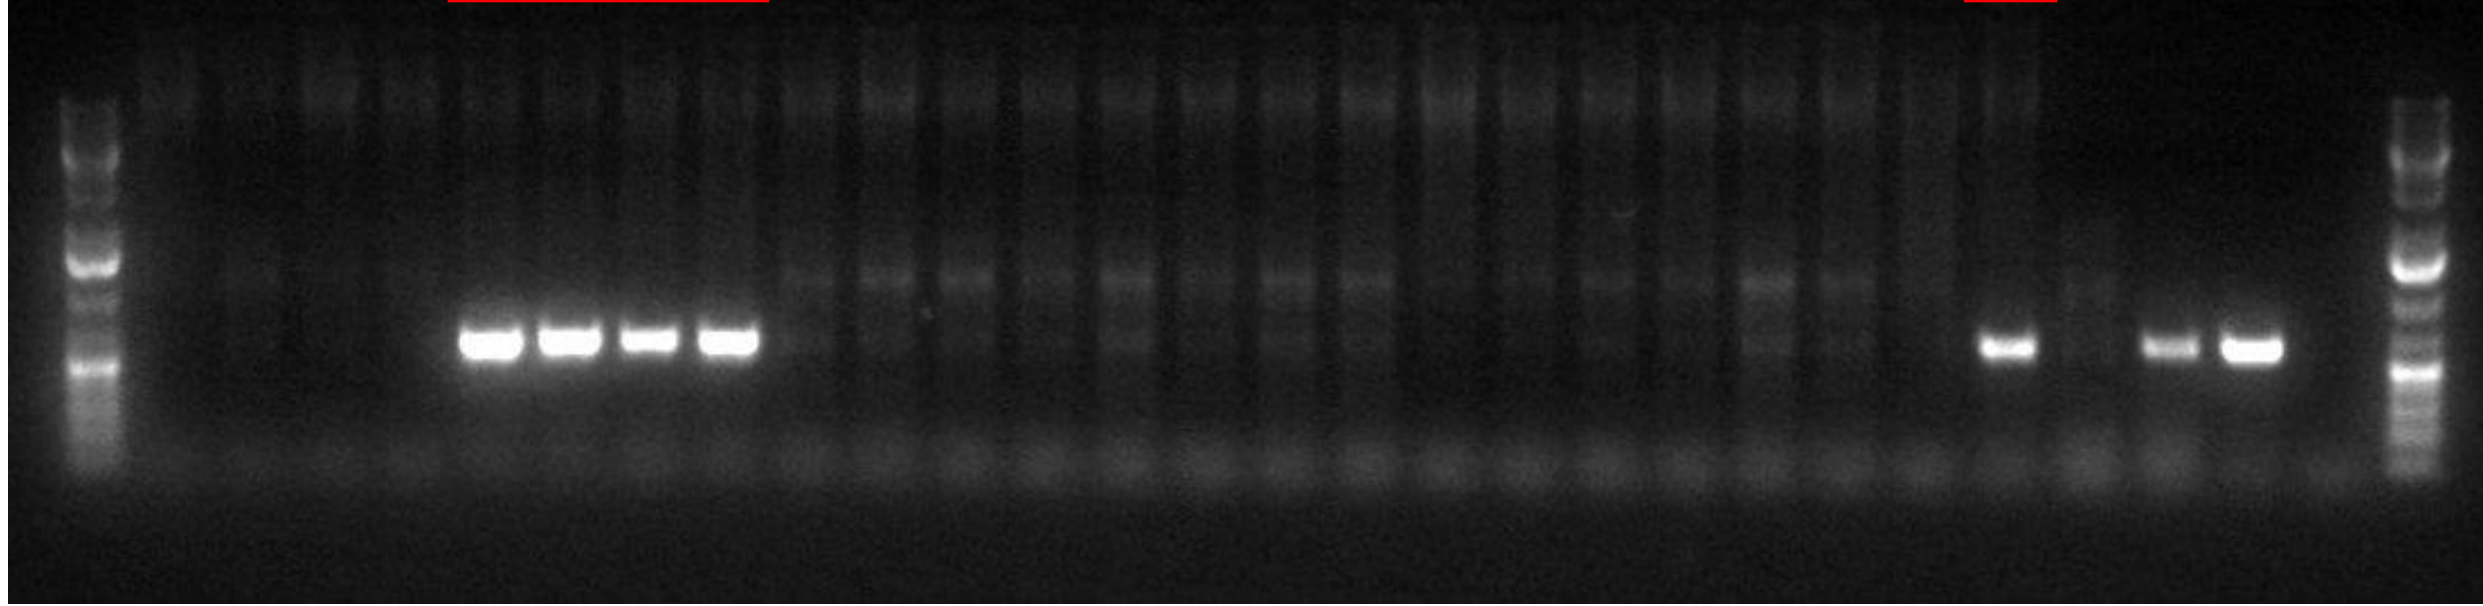

Genomic or vector-based *EBNA-1*

B

1kb ladder  
 Ind4 F-iPSC  
 Ind2-LCL  
 Ind3-LCL  
 Ind4-LCL  
 Ind1-LCL  
 Vector Positive control  
 EBV Positive control  
 Negative control  
 Blank  
 1kb ladder

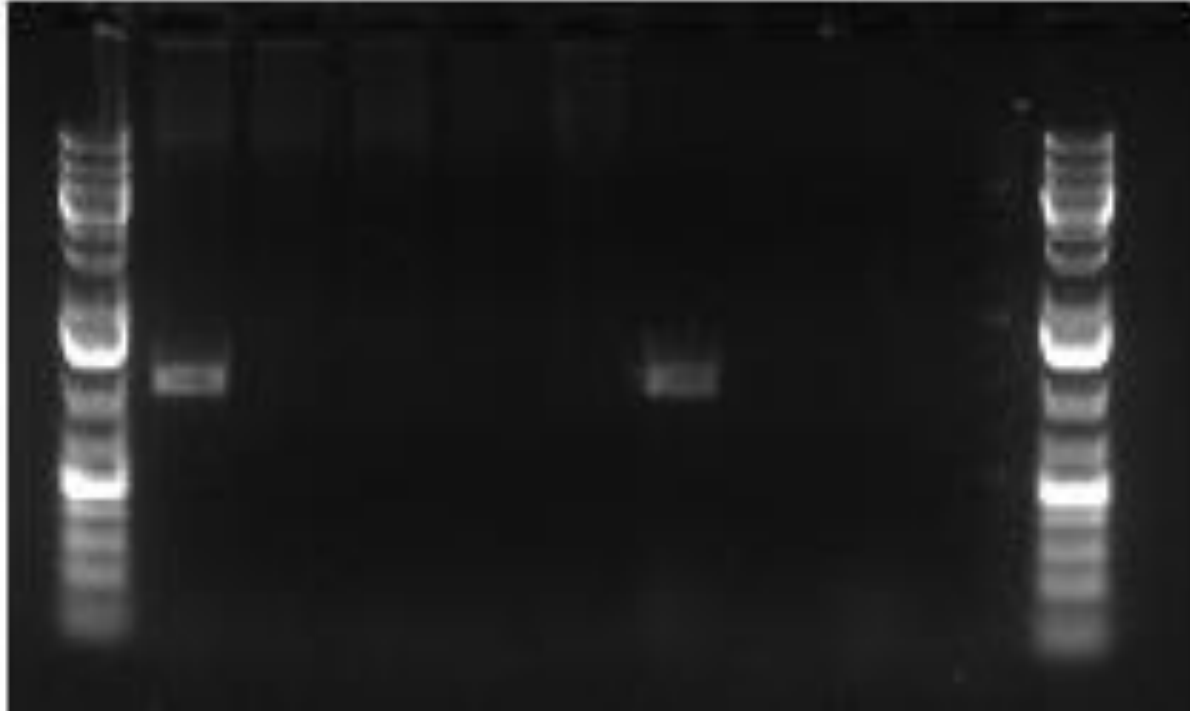

Reprogramming Vectors

C

1kb ladder  
 Ind4 F-iPSC  
 Ind2-LCL  
 Ind3-LCL  
 Ind4-LCL  
 Ind1-LCL  
 Vector Positive control  
 EBV Positive control  
 Negative control  
 Blank  
 1kb ladder

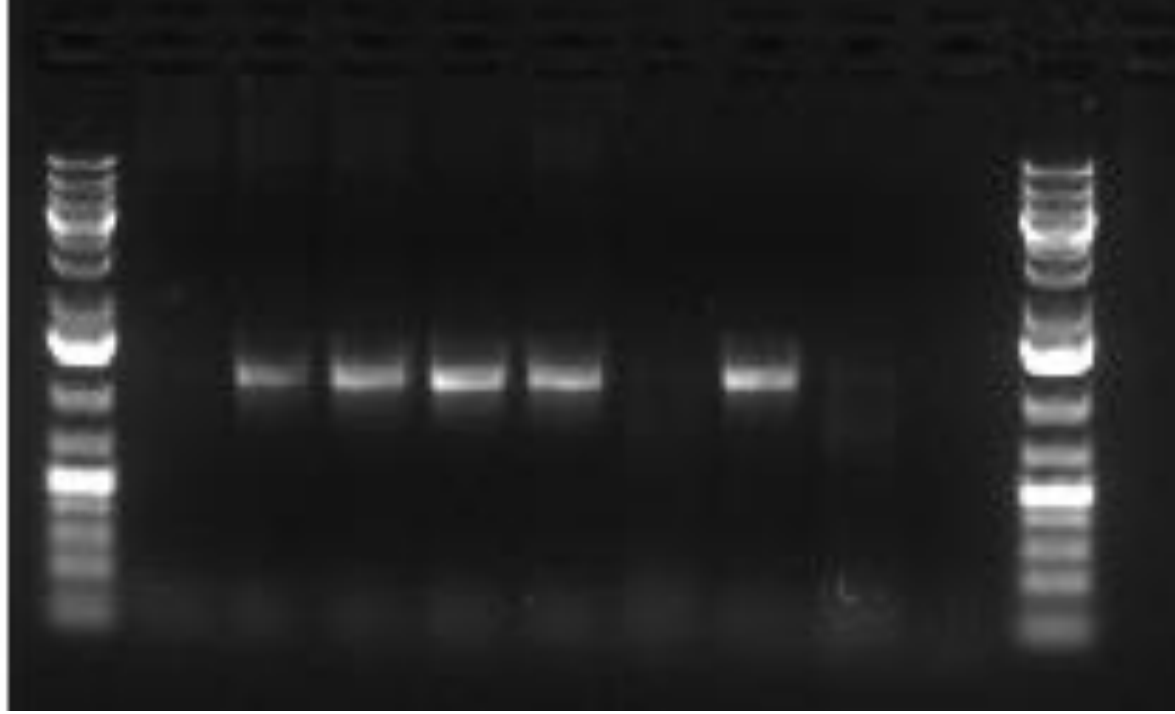

Integrated EBV

**B**

1kb ladder  
Ind4 F-iPSC  
Ind2-LCL  
Ind3-LCL  
Ind4-LCL  
Ind1-LCL  
Vector Positive control  
EBV Positive control  
Negative control  
Blank  
1kb ladder

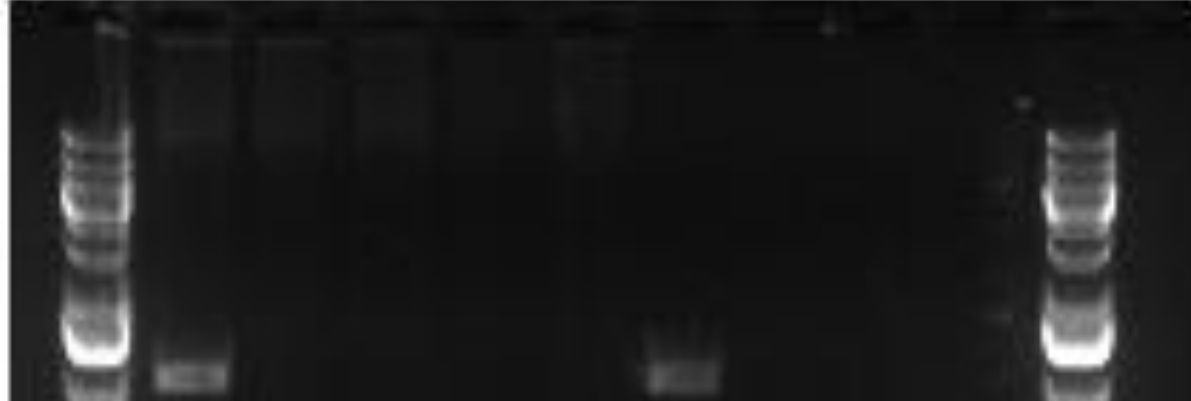

## Genomic or vector-based *EBNA-1*

**C**

1kb ladder  
Ind4 F-iPSC  
Ind2-LCL  
Ind3-LCL  
Ind4-LCL  
Ind1-LCL  
Vector Positive control  
EBV Positive control  
Negative control  
Blank  
1kb ladder

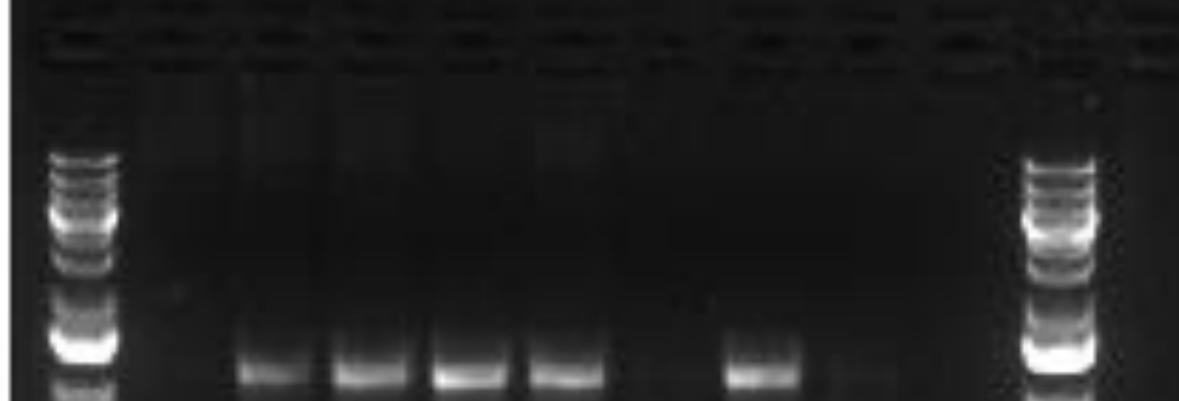

Supplement: pgen.1005793.s003.pdf [file pgen.1005793.s003.pdf]
