# Supplementary material for: Genetic Variation, Not Cell Type of Origin, Underlies the Majority of Identifiable Regulatory Differences in iPSCs
Source: PubMed Central journal article supplement (PMC4727884; doi:10.1371/journal.pgen.1005793), 2016-01-26
Supplement: pgen.1005793.s004.pdf [file pgen.1005793.s004.pdf]

**Ind1 F-iPSC**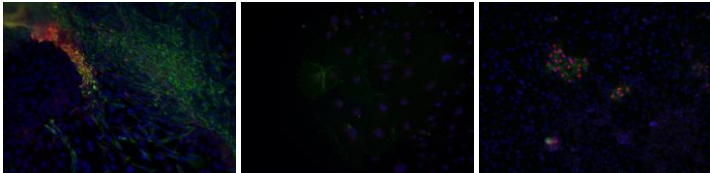**Ind1 L-iPSC A**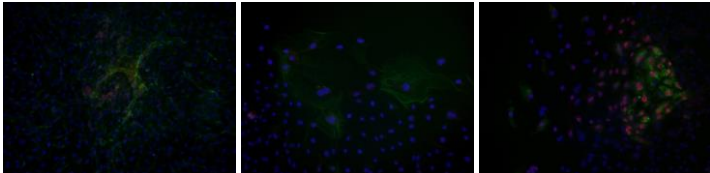**Ind1 L-iPSC B**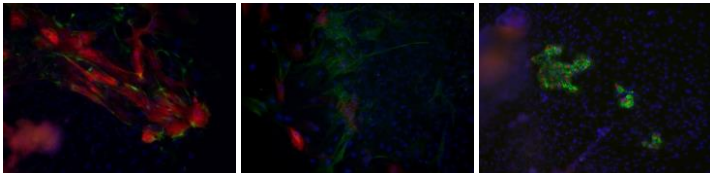**Ind1 L-iPSC C**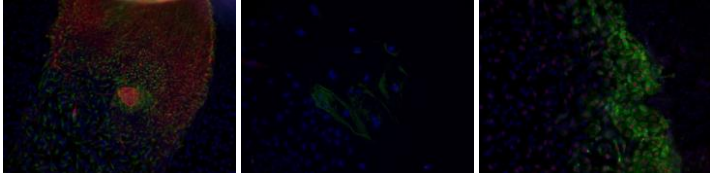

Nestin/MAP2/Hoechst

SMA/MAP2/Hoechst

AFP/HNF3β/Hoechst

**Ind2 F-iPSC**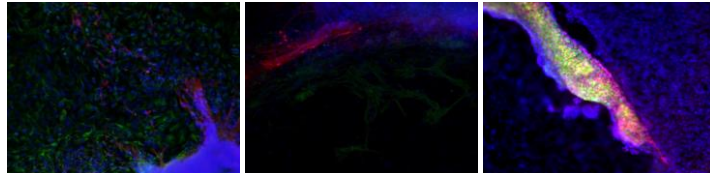**Ind2 L-iPSC A**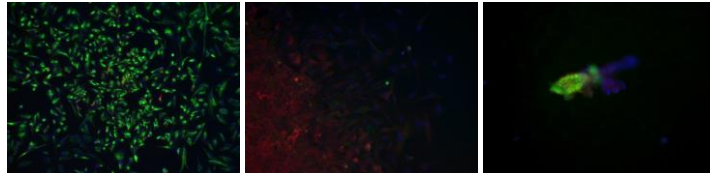**Ind2 L-iPSC B**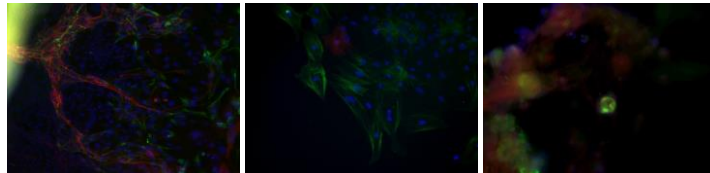**Ind2 L-iPSC C**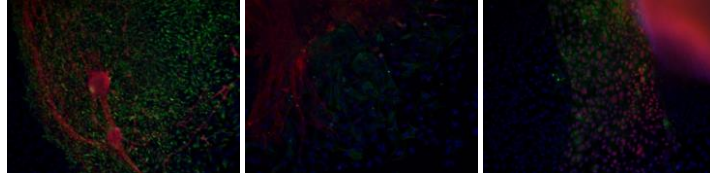

Nestin/MAP2/Hoechst

SMA/MAP2/Hoechst

AFP/HNF3β/Hoechst

**Ind3 F-iPSC**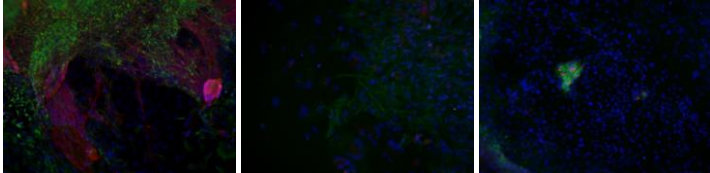**Ind3 L-iPSC A**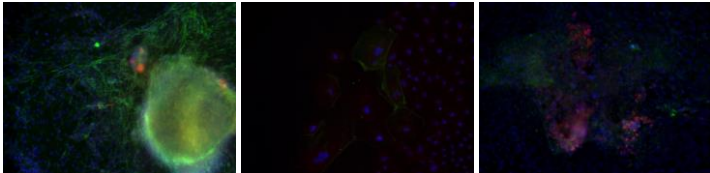**Ind3 L-iPSC B**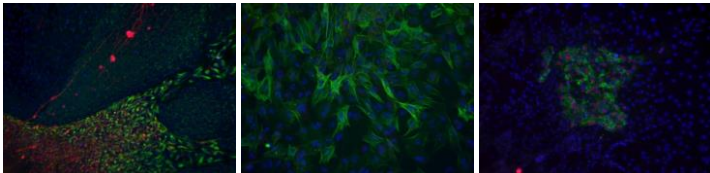**Ind3 L-iPSC C**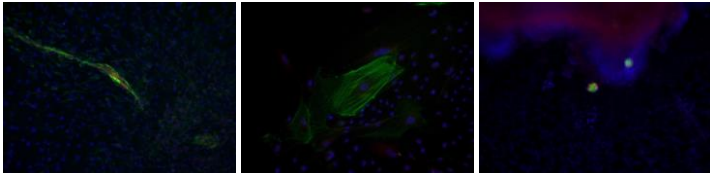

Nestin/MAP2/Hoechst

SMA/MAP2/Hoechst

AFP/HNF3β/Hoechst

**Ind4 F-iPSC**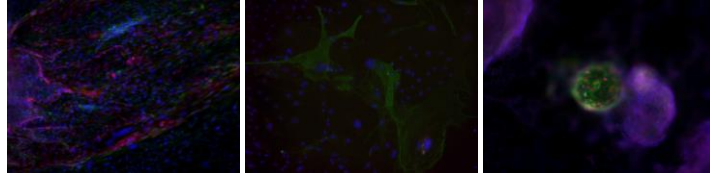**Ind4 L-iPSC A**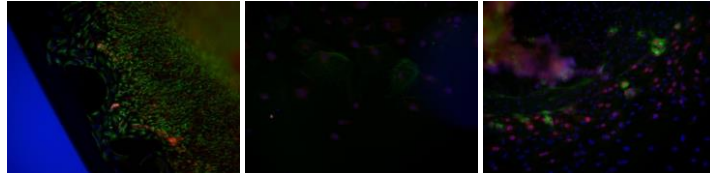**Ind4 L-iPSC B**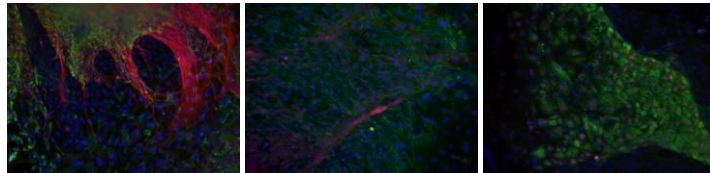**Ind4 L-iPSC C**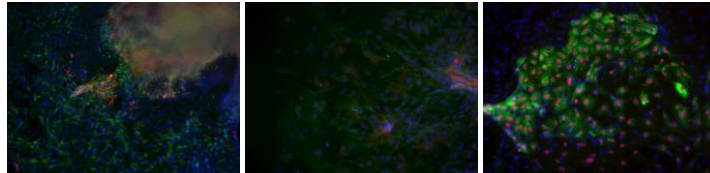

Nestin/MAP2/Hoechst

SMA/MAP2/Hoechst

AFP/HNF3β/Hoechst
