# Supplementary material for: Genetic Variation, Not Cell Type of Origin, Underlies the Majority of Identifiable Regulatory Differences in iPSCs
Source: PubMed Central journal article supplement (PMC4727884; doi:10.1371/journal.pgen.1005793), 2016-01-26

Raw methylation values by probe type  
Ind4 fibroblast

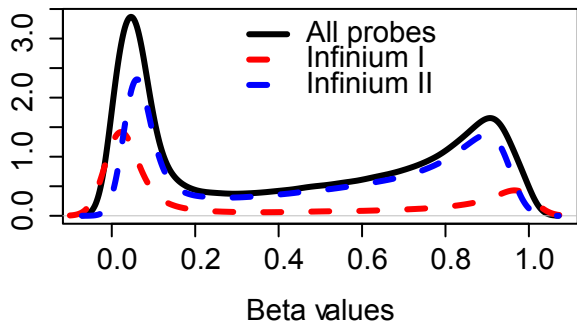

SWAN normalized methylation values  
by probe type Ind4 fibroblast

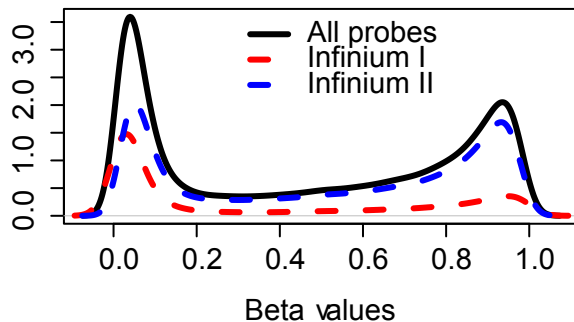

Raw methylation values by probe type  
Ind2 LCL

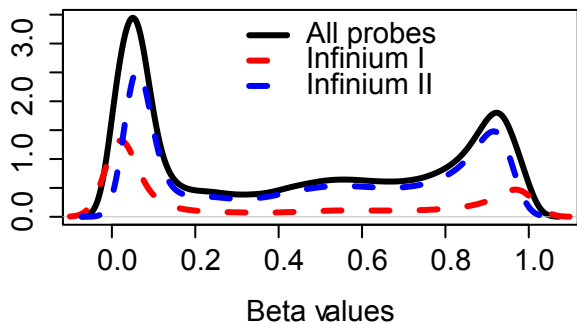

SWAN normalized methylation values  
by probe type Ind2 LCL

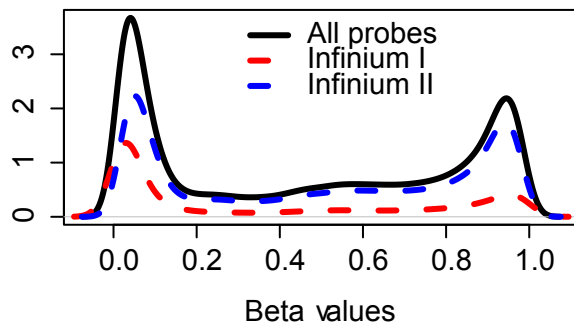

Raw methylation values by probe type  
Ind3 F-iPSC

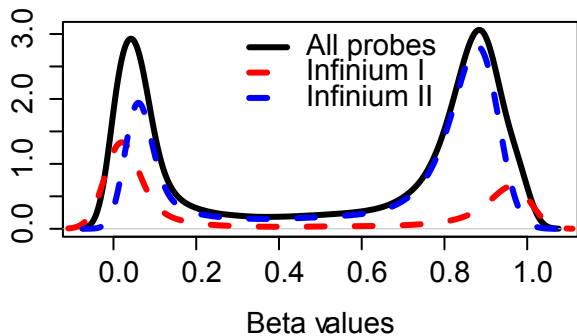

SWAN normalized methylation values  
by probe type Ind3 F-iPSC

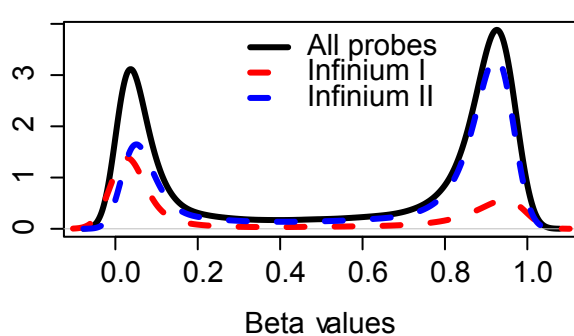

Supplement: pgen.1005793.s005.pdf [file pgen.1005793.s005.pdf]
