# Supplementary material for: Genetic Variation, Not Cell Type of Origin, Underlies the Majority of Identifiable Regulatory Differences in iPSCs
Source: PubMed Central journal article supplement (PMC4727884; doi:10.1371/journal.pgen.1005793), 2016-01-26

**A**

Raw methylation levels by sample

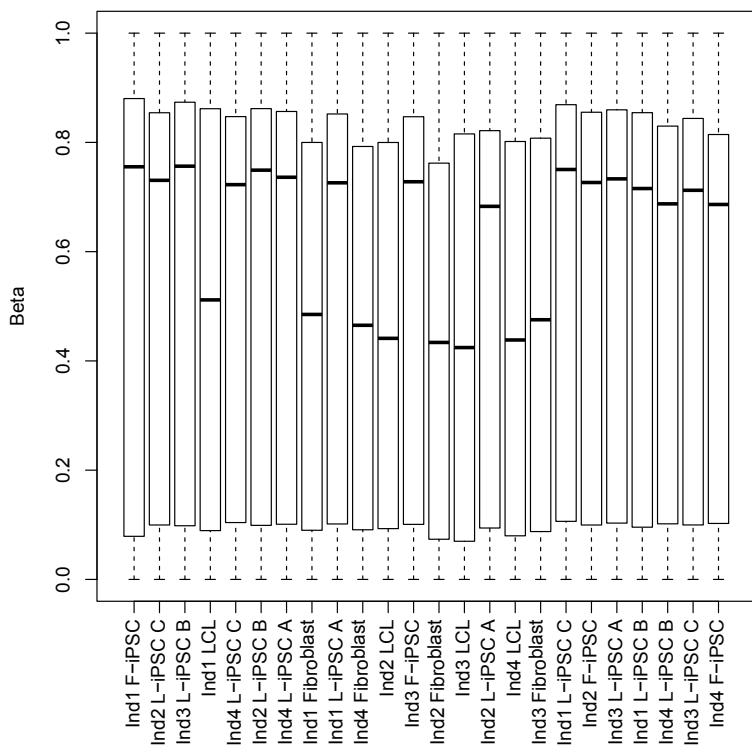**B**

Quantile normalized methylation levels by sample

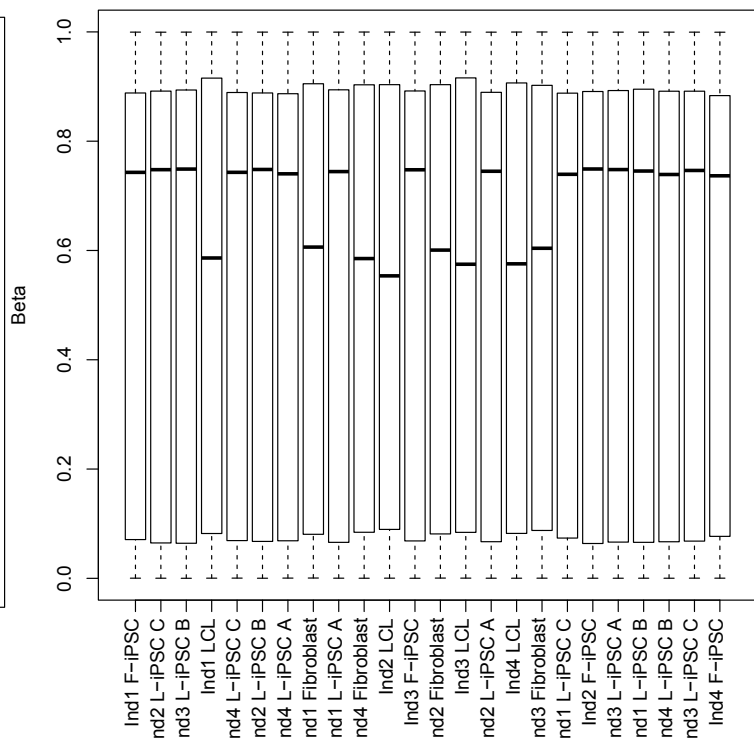**C**

Raw gene expression levels by sample

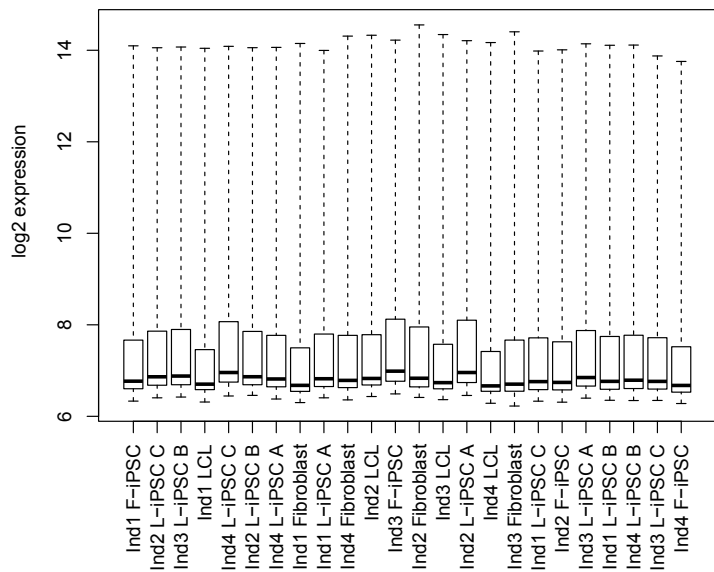**D**

Normalized gene expression levels by sample

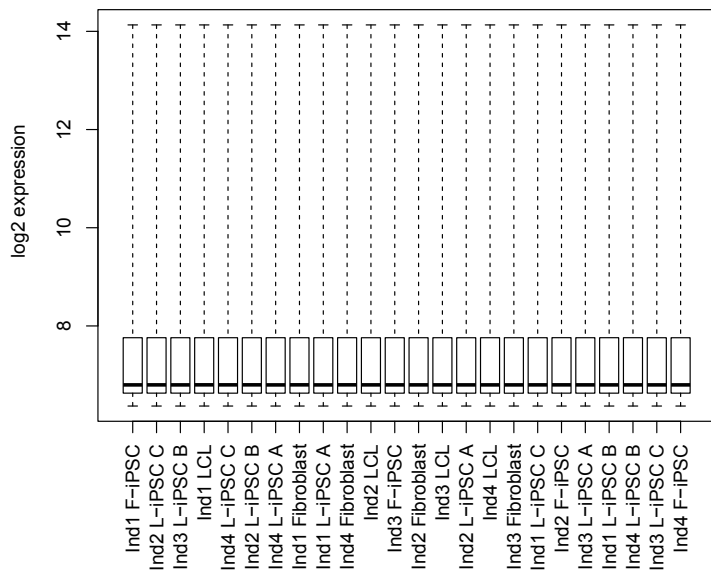

Supplement: pgen.1005793.s006.pdf [file pgen.1005793.s006.pdf]
