# Supplementary material for: Genetic Variation, Not Cell Type of Origin, Underlies the Majority of Identifiable Regulatory Differences in iPSCs
Source: PubMed Central journal article supplement (PMC4727884; doi:10.1371/journal.pgen.1005793), 2016-01-26
Supplement: pgen.1005793.s007.pdf [file pgen.1005793.s007.pdf]

# Probes with detectable gene expression by sample type

Detected in Fibroblasts 11,060

Detected in F-iPSCs 11,448

Detected in L-iPSCs 12,559

Detected in LCLs 10,220

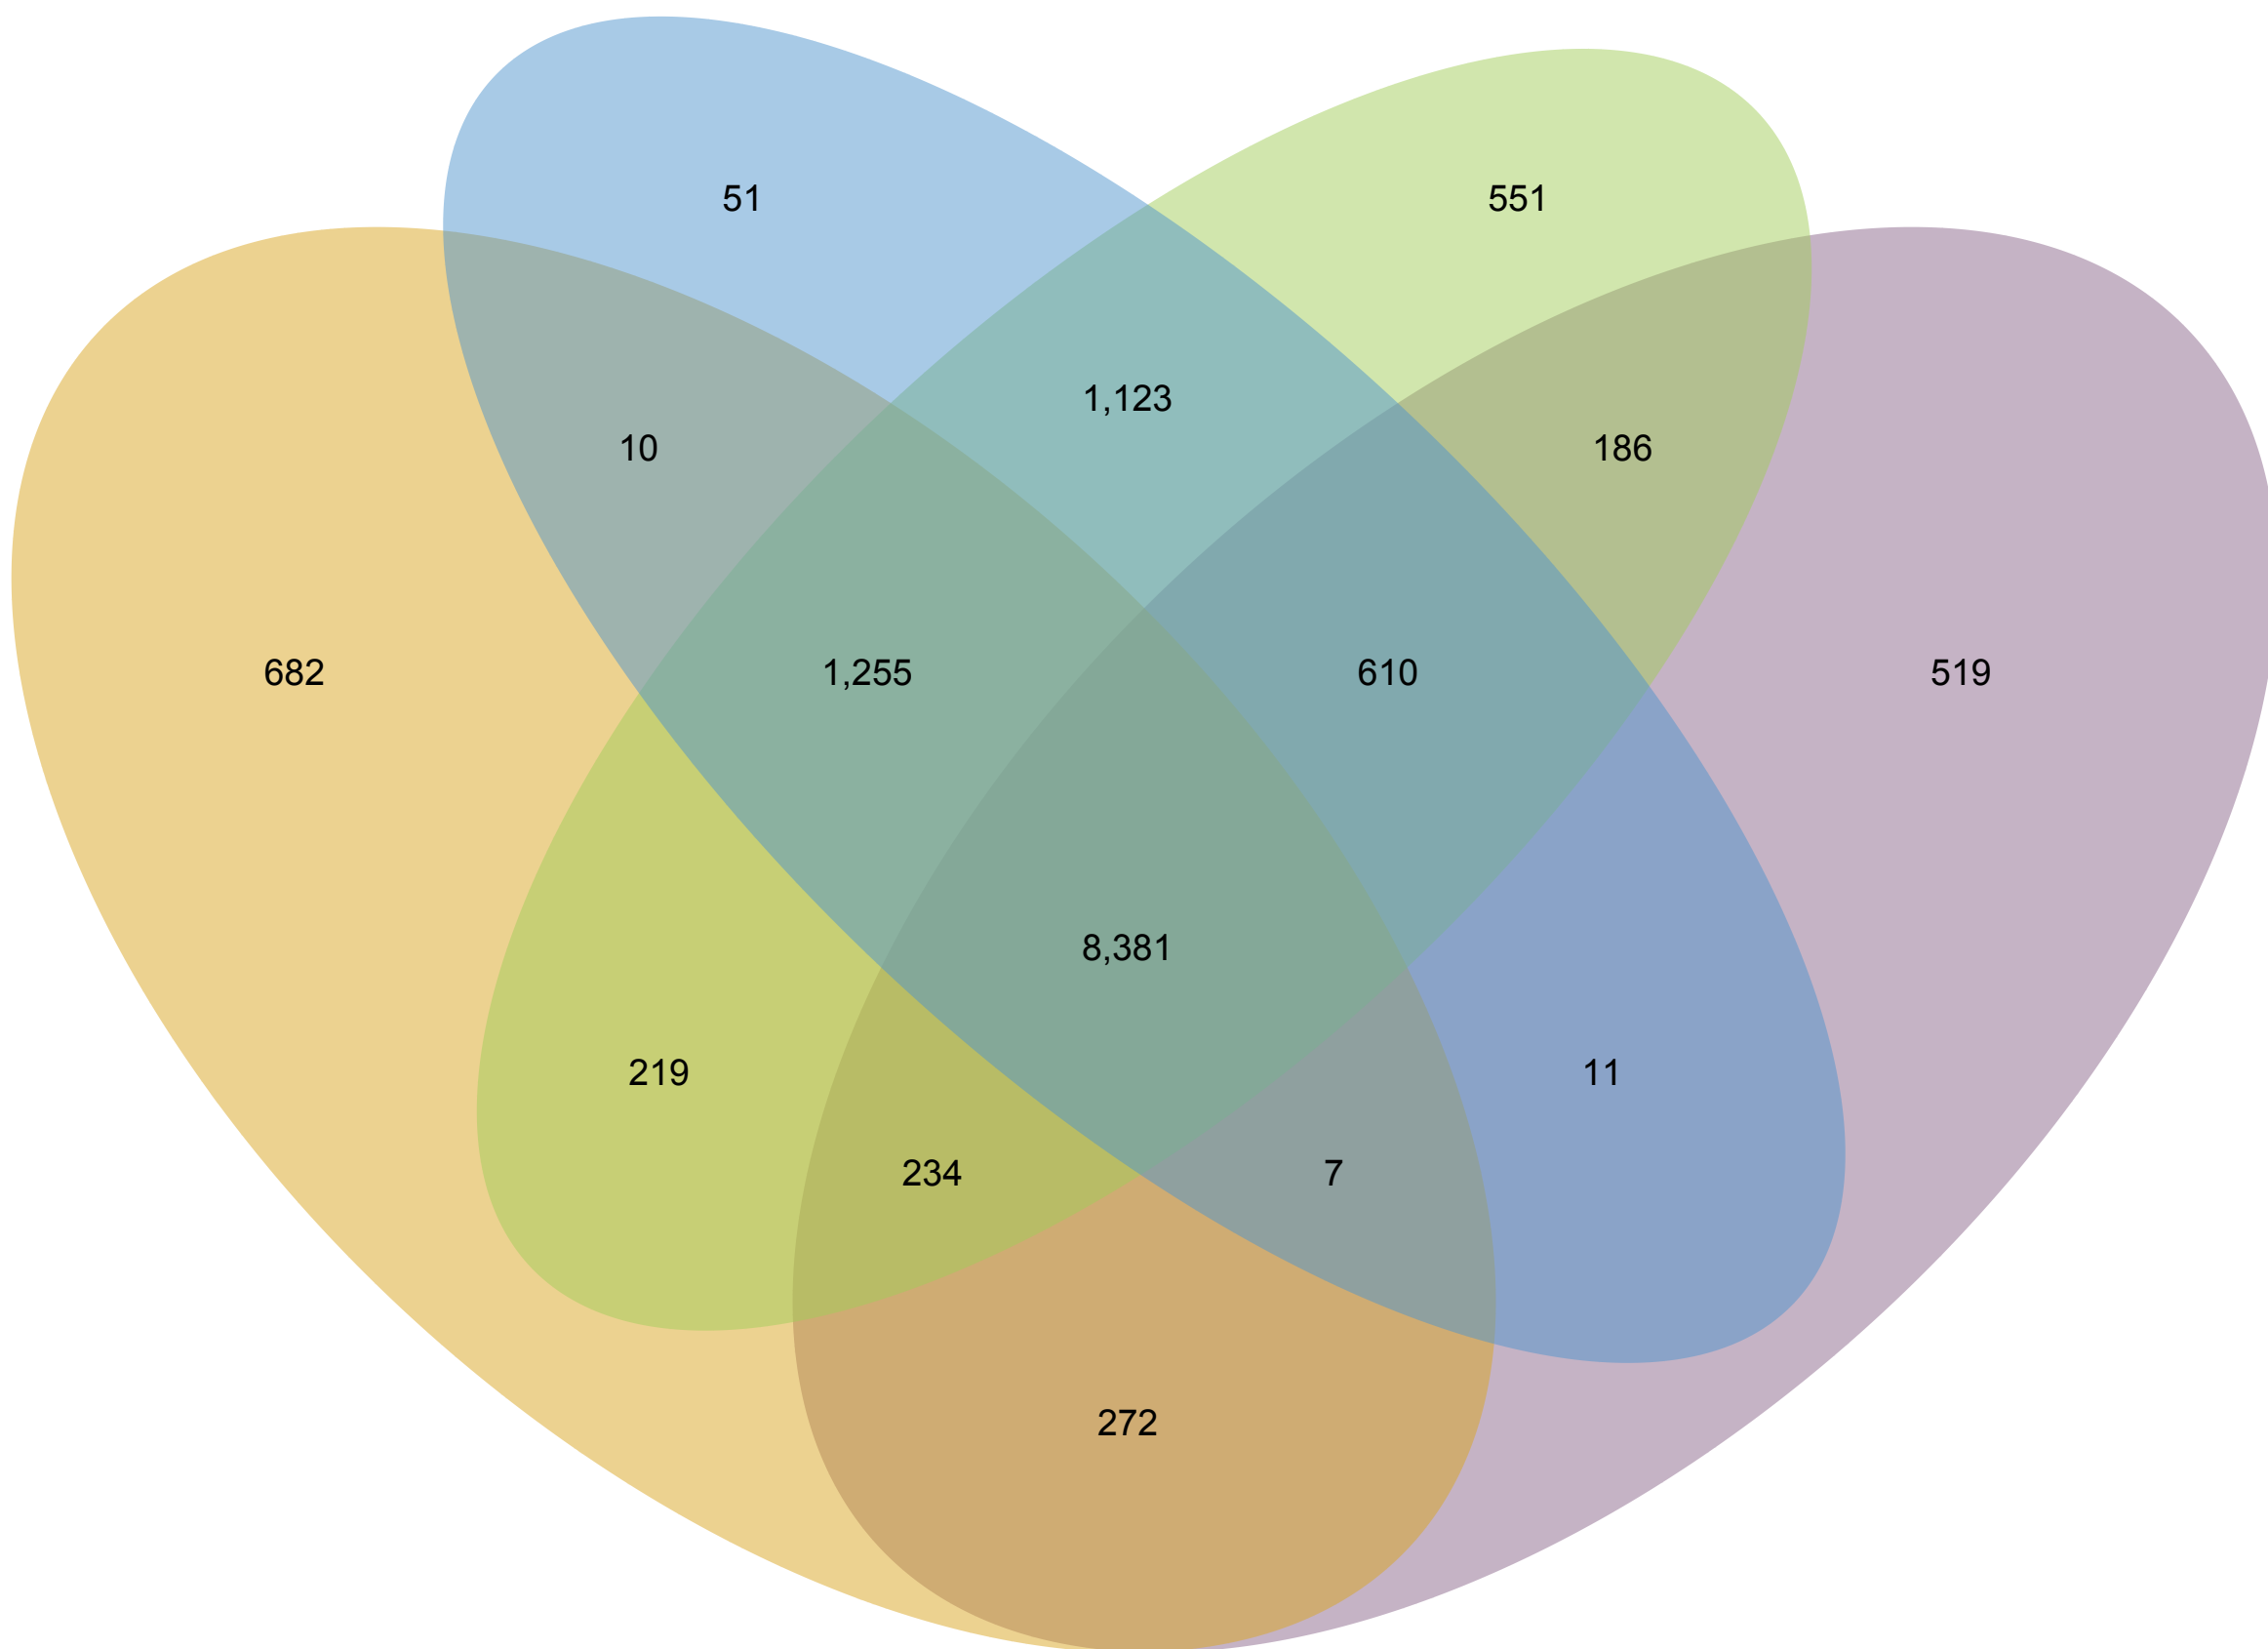

7921 not detected in any
