# Supplementary material for: Genetic Variation, Not Cell Type of Origin, Underlies the Majority of Identifiable Regulatory Differences in iPSCs
Source: PubMed Central journal article supplement (PMC4727884; doi:10.1371/journal.pgen.1005793), 2016-01-26

**A**

Complete linkage clustering dendrogram of 1,000 most variable DNA methylation loci

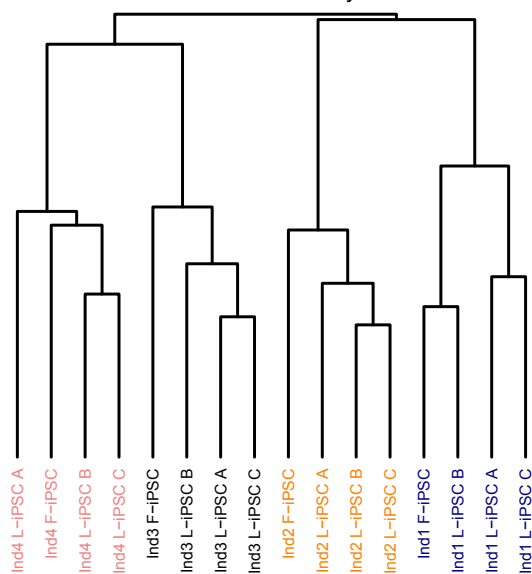**B**

Complete linkage clustering dendrogram of 1,000 most variable genes

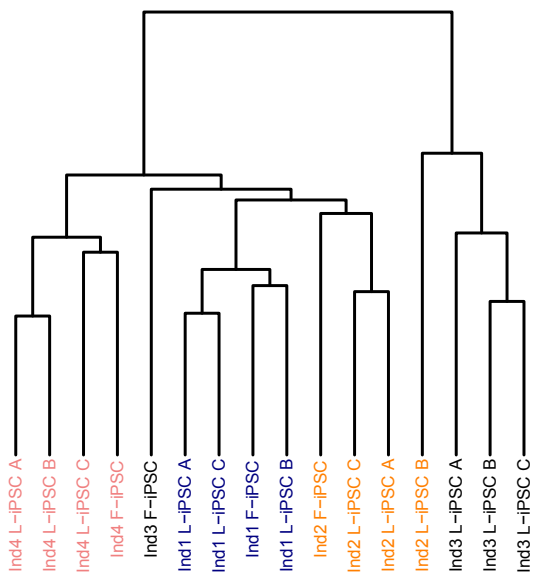**C**

Pearson correlation of methylation levels

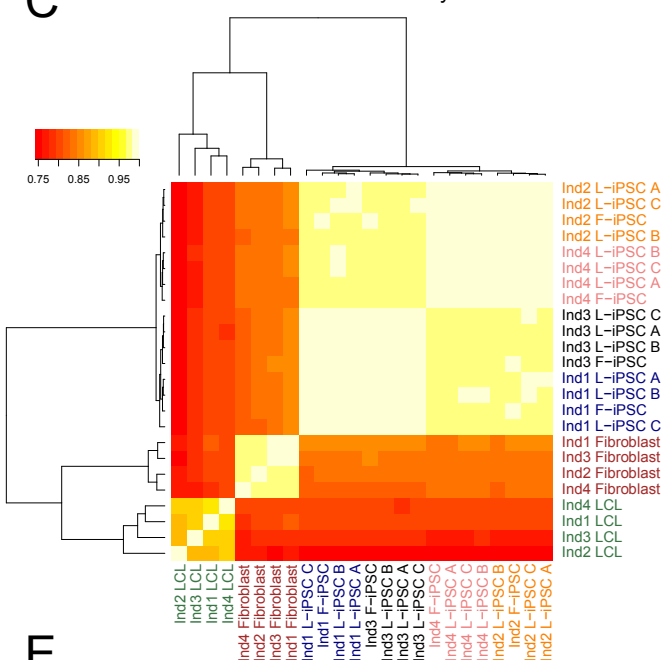**D**

Pearson correlation of gene expression levels

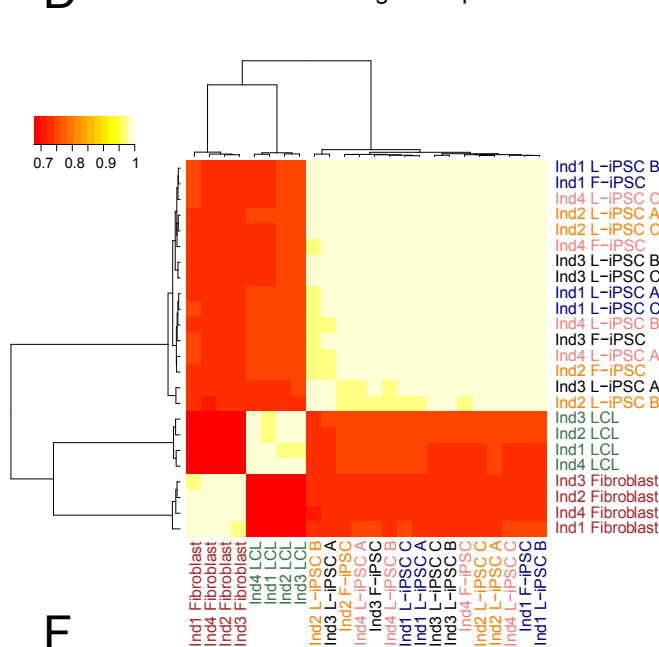**E**

Complete linkage clustering dendrogram of DNA methylation data

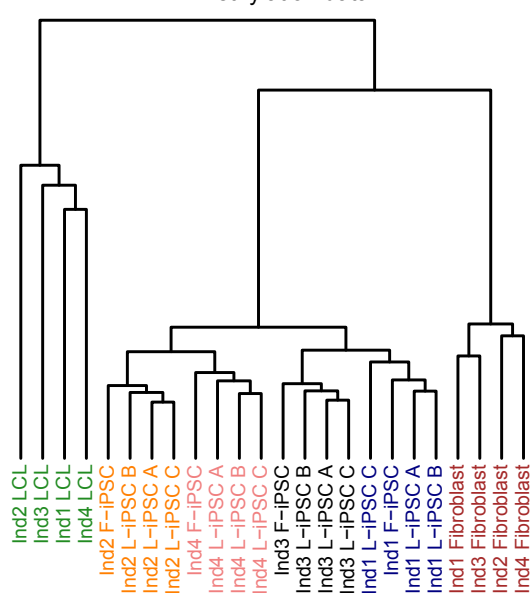**F**

Complete linkage clustering dendrogram of gene expression data

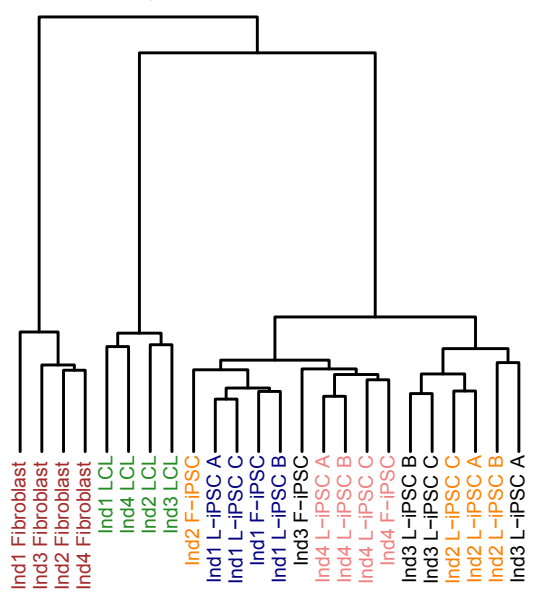

Supplement: pgen.1005793.s008.pdf [file pgen.1005793.s008.pdf]
