# Supplementary material for: Genetic Variation, Not Cell Type of Origin, Underlies the Majority of Identifiable Regulatory Differences in iPSCs
Source: PubMed Central journal article supplement (PMC4727884; doi:10.1371/journal.pgen.1005793), 2016-01-26

A

PCA of DNA methylation levels: iPSCs only

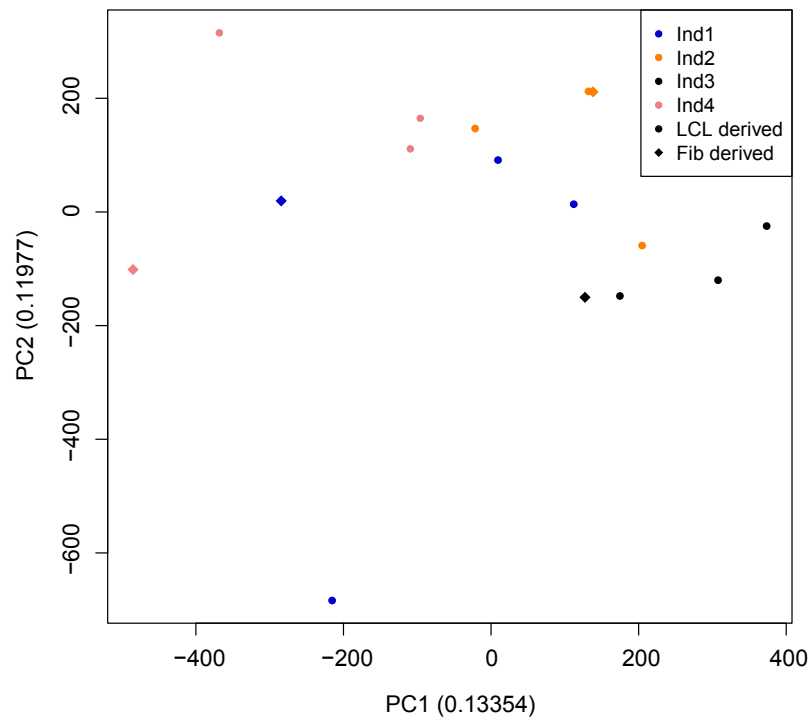

B

PCA of gene expression levels: iPSCs only

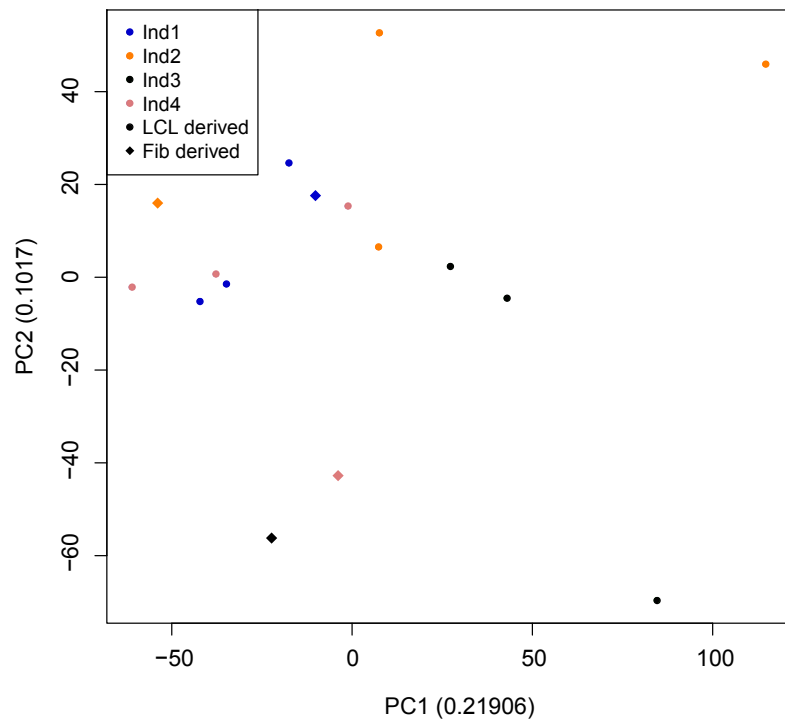

Supplement: pgen.1005793.s009.pdf [file pgen.1005793.s009.pdf]
