# Supplementary material for: Genetic Variation, Not Cell Type of Origin, Underlies the Majority of Identifiable Regulatory Differences in iPSCs
Source: PubMed Central journal article supplement (PMC4727884; doi:10.1371/journal.pgen.1005793), 2016-01-26

# DM Loci shared across contrasts: one L-iPSC replicate

L-iPSCs vs F-iPSCs  
123

L-iPSCs vs LCLs  
247,735

F-iPSCs vs fibroblasts  
200,059

LCLs vs fibroblasts  
161,634

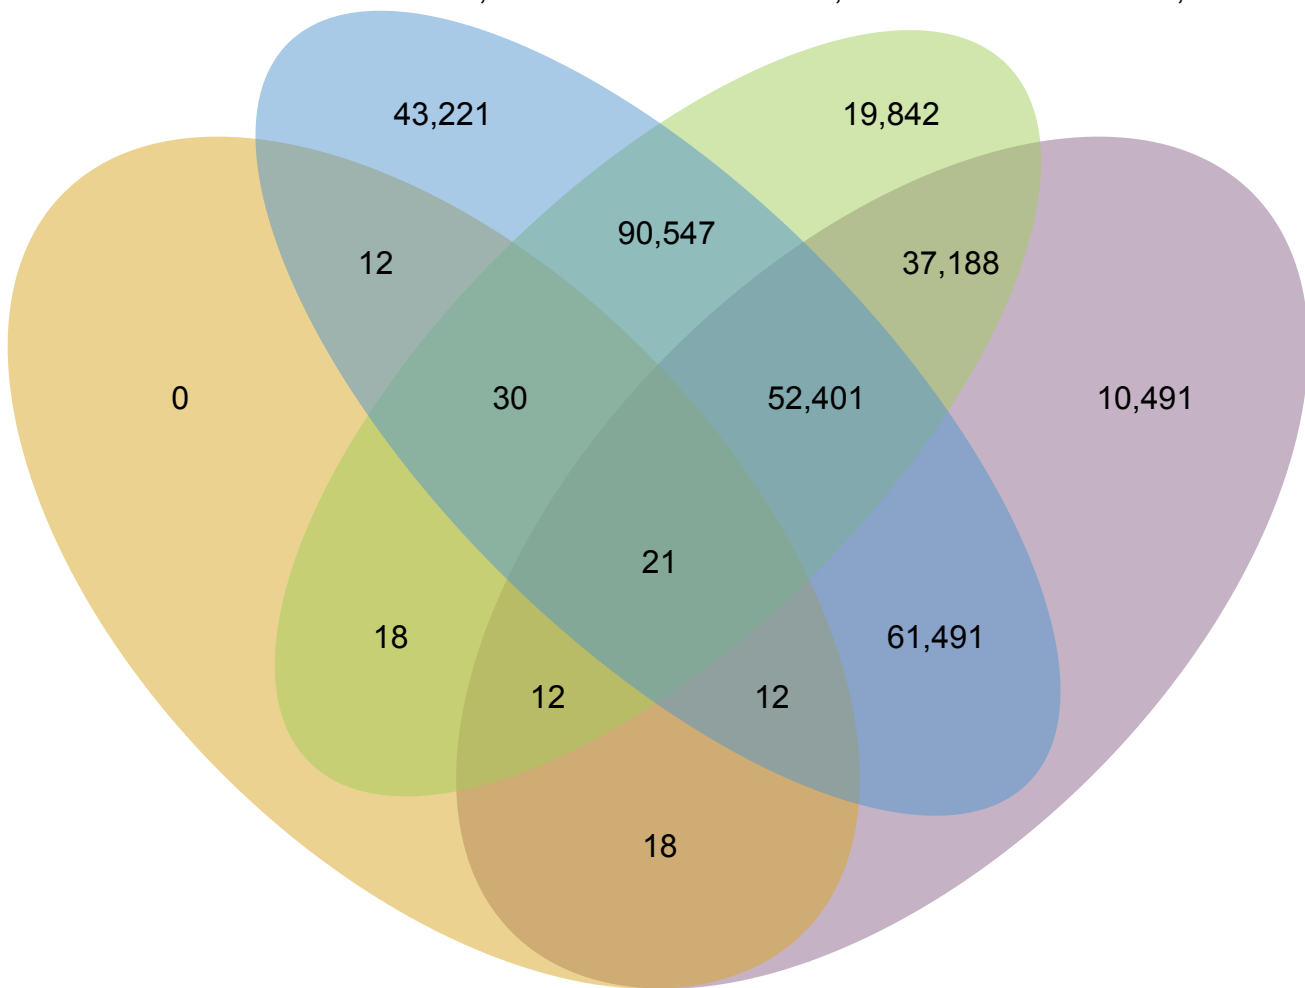

Supplement: pgen.1005793.s012.pdf [file pgen.1005793.s012.pdf]
