# Supplementary material for: Genetic Variation, Not Cell Type of Origin, Underlies the Majority of Identifiable Regulatory Differences in iPSCs
Source: PubMed Central journal article supplement (PMC4727884; doi:10.1371/journal.pgen.1005793), 2016-01-26

A

Methylation level variation in iPSCs explained by individual and cell type of origin - CpGs with a meQTL

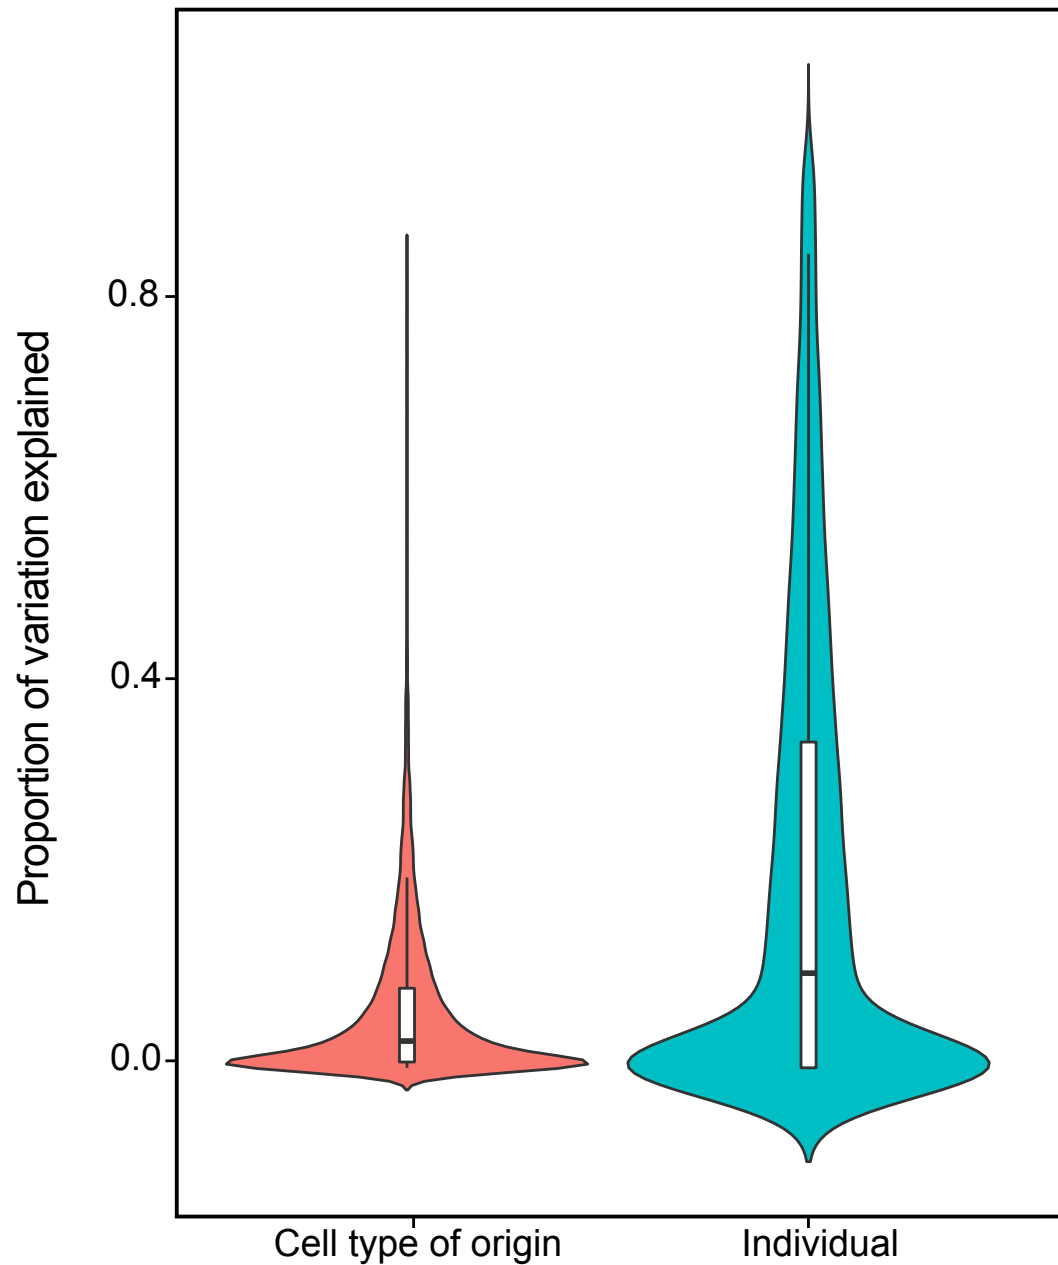

B

Gene expression variation in iPSCs explained by individual and cell type of origin - Genes with an eQTL

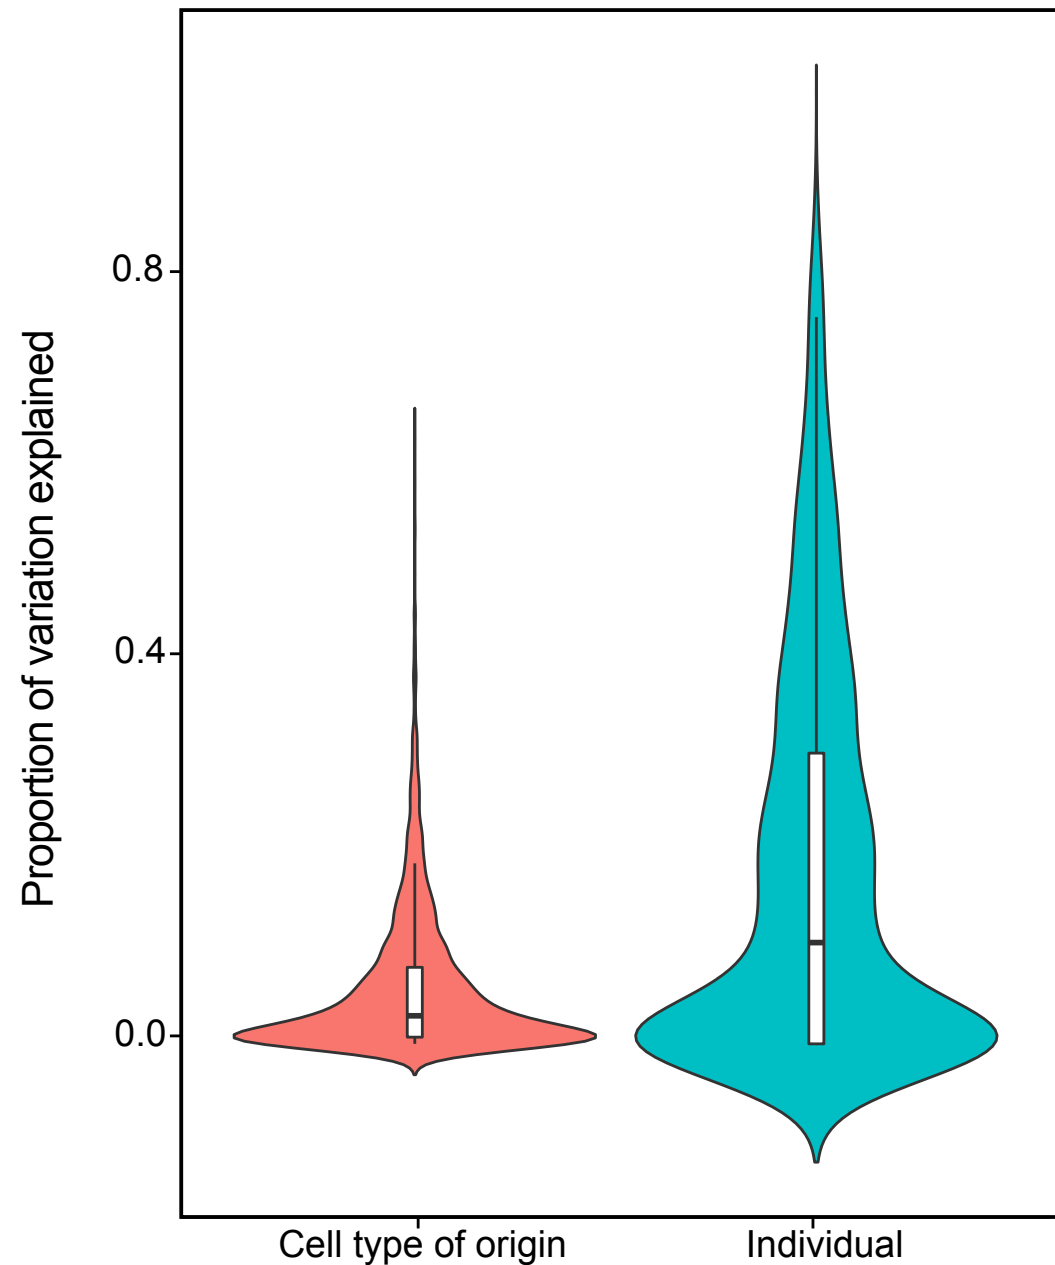

Supplement: pgen.1005793.s013.pdf [file pgen.1005793.s013.pdf]
