# Supplementary material for: Genetic Variation, Not Cell Type of Origin, Underlies the Majority of Identifiable Regulatory Differences in iPSCs
Source: PLoS Genet. 2016 Jan 26;12(1):e1005793. doi: 10.1371/journal.pgen.1005793 (PMC4727884; doi:10.1371/journal.pgen.1005793)
Supplement: S1 Table — PluriTest Result, 0 = not pluripotent, 1 = pluripotent; Cell Type, 1 = iPSC, 2 = LCL, 3 = Fibroblast; Origin, 1 = L-iPSC, 2 = F-iPSC, 3 = LCL, 4 = Fibroblast; Sex, 1 = male, 2 = female. Reprogramming batch 1 = 1/29/2014, 2 = 2/3/2014, 3 = 1/24/2014, 4 = 2/10/2014, 5 = 2/24/2014, and 6 = 3/26/2014. (XLSX) [file pgen.1005793.s014.xlsx]

## Sheet: covar
Array Order	Sample Name	Biopsy/Blood draw	PluriTest Score	PluriTest Result	Novelty Score	Array/Extraction Batch	Reprogramming Batch	Cell Type	Origin	Individual	Sex	Age	RIN
1	Ind1 F-iPSC	NA	32.699	1	1.347	1	2	1	2	1	1	18	10
2	Ind2 L-iPSC C	NA	31.126	1	1.24	1	5	1	1	2	2	28	10
3	Ind3 L-iPSC B	NA	30.355	1	1.485	1	4	1	1	3	1	21	10
4	Ind1 LCL	2012-04-16	-76.452	0	3.08	1	NA	2	3	1	1	18	10
5	Ind4 L-iPSC C	NA	34.271	1	1.269	1	6	1	1	4	2	19	10
6	Ind2 L-iPSC B	NA	25.822	1	1.268	1	4	1	1	2	2	28	10
7	Ind4 L-iPSC A	NA	33.957	1	1.26	1	6	1	1	4	2	19	10
8	Ind1 Fibroblast	2012-04-16	-71.599	0	3.003	1	NA	3	4	1	1	18	10
9	Ind1 L-iPSC A	NA	33.173	1	1.327	1	3	1	1	1	1	18	10
10	Ind4 Fibroblast	2012-05-14	-78.508	0	3.412	1	NA	3	4	4	2	19	10
11	Ind2 LCL	2012-06-26	-73.762	0	3.035	1	NA	2	3	2	2	28	10
12	Ind3 F-iPSC	NA	29.933	1	1.446	1	2	1	2	3	1	21	10
13	Ind2 Fibroblast	2012-06-26	-76.658	0	3.377	2	NA	3	4	2	2	28	10
14	Ind3 LCL	2012-05-14	-76.361	0	3.076	2	NA	2	3	3	1	21	10
15	Ind2 L-iPSC A	NA	29.911	1	1.236	2	3	1	1	2	2	28	10
16	Ind4 LCL	2012-05-14	-73.624	0	3.082	2	NA	2	3	4	2	19	10
17	Ind3 Fibroblast	2012-05-14	-80.802	0	3.495	2	NA	3	4	3	1	21	10
18	Ind1 L-iPSC C	NA	34.66	1	1.431	2	5	1	1	1	1	18	10
19	Ind2 F-iPSC	NA	30.842	1	1.318	2	1	1	2	2	2	28	10
20	Ind3 L-iPSC A	NA	25.037	1	1.282	2	3	1	1	3	1	21	10
21	Ind1 L-iPSC B	NA	31.27	1	1.4	2	4	1	1	1	1	18	10
22	Ind4 L-iPSC B	NA	32.313	1	1.252	2	4	1	1	4	2	19	10
23	Ind3 L-iPSC C	NA	25.46	1	1.426	2	5	1	1	3	1	21	10
24	Ind4 F-iPSC	NA	29.929	1	1.279	2	2	1	2	4	2	19	10
