# Supplementary material for: Genetic Variation, Not Cell Type of Origin, Underlies the Majority of Identifiable Regulatory Differences in iPSCs
Source: PLoS Genet. 2016 Jan 26;12(1):e1005793. doi: 10.1371/journal.pgen.1005793 (PMC4727884; doi:10.1371/journal.pgen.1005793)
Supplement: S5 Table — PCR primers and conditions for all PCRs used; TM = melting temperature. Cycling conditions were per manufacturers recommendations and more specifically 30 cycles of the following: 94°C for 15 seconds, 58°C for 20 seconds, and 68°C for 30 seconds (OneTaq DNA Polymerase, NEB). (XLSX) [file pgen.1005793.s018.xlsx]

## Sheet: Sheet1
Sequence Name	Sequence	Melting Temperature	Pair Amplicon	Purpose
EBNA1_End1_F	ATC ATC ATC CGG GTC TCC ACC G	72	612	Detects both reprogramming plasmid and LCL genome integrations, amplifies 3' end of EBNA-1
EBNA1_End1_R	ATT GCA GGT AGG AGC GGG CTT TG
EBV_Genome_F	ATC AGG CTG CAT GTG CTC TTC CC	72	1058	Detects LCL genome integrations only, amplifies region in BBRF1/LMP2
EBV_Genome_R	TTT GCA TGG TCA GGC TCC GTG TC
PCXLE_Common_F	TTTGCAAGCAGCAGATTACGCGCAG	72	1009	Detects reprogramming plasmid integrations only, amplifies part of the bacterial resistance casette
PCXLE_Common_R	TTTGCTCACCCAGAAACGCTGGTGAAAG
